# Supplementary material for: Assessment of food trade impacts on water, food, and land security in the MENA region
Source: Copernicus journal article supplement (doi:10.5194/hess-2018-398), 2018-09-17
Supplement: Supplementary file [file hess-2018-398-AC1-supplement.zip]

# Assessment of food trade impacts on water, food, and land security in the MENA region

Sang-Hyun Lee<sup>1</sup>, Rabi H. Mohtar<sup>2</sup>, Seung-Hwan Yoo<sup>3</sup>

<sup>1</sup> Research Institute for Humanity and Nature (RIHN), Motoyama 457-4, Kamigamo, Kita-ku, Kyoto 603-8047, Japan

<sup>2</sup> Department of Biological and Agricultural Engineering, Texas A&M University, College Station, USA and Faculty of Agricultural and Food Sciences, American University of Beirut, Beirut, Lebanon

<sup>3</sup> Department of Rural and Bio-systems Engineering, Chonnam National University, Gwangju, Republic of Korea

Correspondence to: Rabi H. Mohtar ([mohtar@tamu.edu](mailto:mohtar@tamu.edu) and [mohtar@aub.edu.lb](mailto:mohtar@aub.edu.lb))

## Abstract

The Middle East and North Africa (MENA) region has the largest water deficit in the world. It also has the least food self-sufficiency. Increasing food imports and decreasing domestic food production can contribute to water savings and hence to increased water security. However, increased domestic food production is a better way to achieve food security, even if irrigation demands increase in accordance to projected climate changes. Accordingly, the trade-off between food security and the savings of water and land through food trade is considered as a significant factor for resource management, especially in the MENA. Therefore, the aim of this study is to analyze the impact of food trade on food security and water-land savings in the MENA region. We concluded that the MENA region saved significant amounts of national water and land based on the import of four major crops, namely, barley, maize, rice, and wheat, within the period from 2000 to 2012, even if the food self-sufficiency is still at a low level. For example, Egypt imported 8.3 million ton/year of wheat that led to 7.5 billion m<sup>3</sup> of irrigation water and 1.3 million ha of land savings. In addition, we estimated the virtual water trade (VWT) that refers to the trade of water embedded in food products and analyzed the structure of VWT in the MENA region using degree and eigenvector centralities. The study revealed that the MENA region focused more on increasing the volume of virtual water imported during the period 2006–2012, yet little attention was paid to the expansion of connections with country exporters based on the VWT network analysis.

**Keyword:** *Food security; Food self-sufficiency; Food trade; Virtual water; MEAN.*

## 1 Introduction

Food security and water scarcity are urgent socio-economic and environmental issues in the Middle East and North Africa (MENA) region (Saladini et al., 2018), which are highly interlinked, and Water-Energy-Food Nexus has been suggested as a proper and integrated approach for resource management (Bazilian et al., 2011; Rasul, 2014; Mohtar and Daher, 2014; Lee et al., 2018). For example, food security in the MENA region has become complicated by increased risks owing to the geopolitical challenges and inability to satisfy needs with domestic production because of the lack of adequate arable land and water resources (Rastoin and Cheriet, 2010). In addition, food imbalance in the MENA region is forecast to reach 60 % in 2050 and food security in MENA region could be extremely compromised (Rastoin and Cheriet, 2010). Climate change could lead to more frequent occurrence of extreme climatic events in Mediterranean region, accompanying 50 % decrease of agricultural production by the end of the century (Porter et al., 2014). In particular, water saving through food trade can be suggested as a solution for mitigating groundwater depletion in the MENA region (Lezzaik et al., 2018).

In this study, we focused on the role of food trade in the MENA region in terms of resource management. Accordingly, we applied the concept of virtual water trade (VWT), which refers to the trade of water embedded in food products (Allan, 1993; Aldaya et al., 2010; Antonelli and Tamea, 2015), in order to assess the food trade impact on water savings in MENA region. International trade in food commodities has been shown to save water, thus food trade is an important element of both food

41 and water security in water-scarce regions (Hoekstra, 2003; Chapagain et al., 2006; Hanjra and Qureshi, 2010; Fader et al.,  
42 2011; Konar et al., 2012). In addition, food trade could contribute to global water savings if food is exported by countries with  
43 a higher water productivity than the countries of import (Konar et al., 2012). The concept and quantitative estimates of virtual  
44 water can help to realistically assess water scarcity for each country, projecting future water demand for food supply, thus  
45 increasing public awareness on water and identifying water-wasting processes in production (Oki and Kanae, 2004). For water-  
46 scarce countries, achieving water security by importing water intensive products could be a more attractive option compared  
47 to producing all water-demanding products domestically (Hoekstra and Hung, 2005). The global volume of international crop-  
48 related virtual water flows averaged 695 billion m<sup>3</sup>/year over the period 1995–1999, which means that 13% of the water used  
49 for crop production in the world was not used for domestic consumption but rather for export in virtual forms (Hoekstra and  
50 Hung, 2005). Falkenmark and Lannerstad (2010) estimated that it would be necessary to double the VWT by 2050 to  
51 compensate for agricultural water deficits because of climatic change, population increase, and the pattern of food supply per  
52 capita. For example, an average of 20% of the per capita food energy supply was assumed to originate from animal foods to  
53 ensure sufficient protein content, and additional water was required to produce animal foods compared to other food types  
54 (Falkenmark and Lannerstad, 2010).

55 The VWT could contribute to the relief of water stress through the use of global water in a more efficient manner in the event  
56 of an increase in the global food trade (Molden, 2007). Additionally, the VWT and the respective savings garnered through  
57 the trade of agricultural goods have been quantified in a number of studies. Oki and Kanae (2004) investigated that  
58 approximately 1140 km<sup>3</sup>/year of virtual water could be used for altering the import of food products to domestic products, e.g.,  
59 cereals, soybeans, and meat; however, 680 km<sup>3</sup>/year of water was used to produce these food types in exporting areas. Yang  
60 et al. (2006) revealed that the VWT could generate global water savings because virtual water has flown primarily from  
61 countries of increased crop water productivity to countries of low-crop water productivity. In their study, 336.8 km<sup>3</sup>/year of  
62 water were saved globally by the international trade of major food crops from 1997 to 2001, while 20.4% of the total global  
63 net virtual water import was imported by countries that have water availability below 1700 m<sup>3</sup> per capita, such as the Arab  
64 countries. Fader et al. (2011) calculated the VWT based on the trade of crop products, and compared it with the water  
65 requirements for producing crop products in each country for domestic consumption without international trade. Generally,  
66 exporters use less water for production of crop products than importers. Thus, the trade of crop products saves 263 km<sup>3</sup>/year  
67 of water globally, thereby representing 3.5% of the annual precipitation on cropland (Fader et al., 2011). In particular, water-  
68 scarce countries, such as China and Mexico, as well as land-scarce countries such as Netherlands and Japan, saved large  
69 amounts of water by importing goods that require water in the range from 25 to 73 km<sup>3</sup>/year, because they would otherwise  
70 need relatively large amounts of water to produce the goods they import. According to the study by Biewald et al. (2014), blue  
71 water, which refers to the irrigation water supplied from artificial facilities, such as reservoirs, ground water pumping or  
72 desalination stations, was saved in importing countries by importing products in accordance to international trade. It is expected  
73 that this can elicit enormous benefits in water-scarce regions. For example, 17 billion m<sup>3</sup> of blue water per year were saved by  
74 the global food trade, and the value of blue water saving was estimated to 2.4 billion US\$.

75 Previous studies showed that the effective import of virtual water may reduce water use for domestic food production in  
76 importing countries and help alleviate water stress in the MENA region where the largest water deficit in the world exists  
77 (Gleick, 2000; World Bank, 2009). The critical condition of water scarcity in the MENA region will reach severe levels by  
78 2025 (Tolba, 2009). In addition, if population increases rapidly and urbanization continues fast, availability of water could be  
79 reduced in the Arab countries by approximately 50% by the year 2025 (Abahussain et al., 2002). Water shortages will certainly  
80 speed up the rate of desertification in the Arab countries (Abahussain et al., 2002). Agricultural water withdrawals account for  
81 over 85% of the total water withdrawn by the various countries of the MENA region (FAO, 2014). Irrigation systems in the  
82 MENA region are based on pumping groundwater resources, such as aquifers, and water security is being threatened by the  
83 declining aquifer levels and the extraction of nonrenewable groundwater (Antonelli and Tamea, 2015). In addition, Immerzeel

84 et al. (2011) expected that the unfulfilled water demand in the entire MENA region would increase from the current level of  
85 16% to 51% in 2040–2050 owing to climate changes. The zone of severely reduced rainfall extends throughout the  
86 Mediterranean region and the Northern Sahara (Hennessy et al., 2007). Milly et al. (2005) estimated that climate change will  
87 cause a decrease in water run-off by 20% to 30% in most of the MENA region by 2050, mainly owing to the rising temperatures  
88 and lower precipitation. In addition, the regions that include Syria, Lebanon, Israel, and Jordan, will get drier, with significant  
89 rainfall decreases in the wet season.

90 However, the high dependency on food import can be a risk of food security, even if it can elicit domestic water, energy, and  
91 land savings, in water-scarce regions. Therefore, we should consider a trade-off between food security and resource savings,  
92 using a holistic approach, such as Trade-WFL(Water-Food-Land) Nexus. Furthermore, the VWT can be suggested as relevant  
93 to the water policy of a nation (Schyns and Hoekstra, 2014), thus establishing a new point-of-view from which both food  
94 security and sustainable water management are considered (Novo et al., 2009).

95 This study addresses three questions that relate to the role and impact of the VWT in the MENA region, that are raised to draw  
96 attention to the complexity of the issue and the need for a broader view in assessment. Specifically, 1) what are the effects of  
97 the VWT on water savings and land tenure in the MENA region, 2) has the structure of the virtual water import in the MENA  
98 region been vulnerable or robust? 3) Who are the influential importers and exporters in the VWT network in the MENA region?  
99 The aim of this study is to evaluate the effects on water savings and land tenure from importing crops at 15 countries in the  
100 MENA region such as Algeria, Egypt, Iraq, Jordan, Kuwait, Lebanon, Libya, Morocco, Oman, Qatar, Saudi Arabia, Syria,  
101 Tunisia, UAE, and Yemen. In addition, we quantified the amount of VWT from 2000 to 2012, and analyzed a structure of the  
102 VWT, such as the connectivity and influence in the MENA region using degree and eigenvector centralities.

## 103 **2 Materials and Methods**

### 104 **2.1 VWT based on international trade**

105 The VWT represents the water embedded in international trade, and it indicates the water used in the exporting country to  
106 produce crops for export. Therefore, the VWT is calculated based on the water footprint of exporters, which indicates the total  
107 amount of water used for producing crop, and the export of virtual water in the exporting country has the same meaning as the  
108 import of virtual water has in the importing country. For example, Saudi Arabia imported wheat from various exporters, and  
109 the virtual water import(or export) was calculated by multiplying the quantity of traded wheat with the respective water  
110 footprint of exporters. Accordingly, the main factors for quantifying a VWT are the trade data and water footprint, and the  
111 VWT is calculated by multiplying the trade by its associated water footprint in the exporting country, as follows:

$$112 \text{VWT} [n_e, n_i, c, t] = \text{CT} [n_e, n_i, c, t] \times \text{WFP} [n_e, c], \quad (1)$$

113 where the variable VWT denotes the virtual water trade from the exporting country,  $n_e$ , to the importing country,  $n_i$ , in year  
114  $t$ , as a result of trade in crop  $c$ , CT represents the crop trade from the exporting country,  $n_e$ , to the importing country,  $n_i$ , in  
115 year  $t$  as a result of trade in crop  $c$ , and WFP represents the water footprint of crop  $c$  in the exporting country,  $n_e$ .

116 The international trade data of the four major crops, namely, barley, maize, rice, and wheat from 2000 to 2012 was obtained  
117 from FAOSTAT (<http://www.fao.org/faostat/>), as shown in Table 1. The crop with the largest amount of import was wheat,  
118 with 27.6 million ton/year imported by the MENA region from 2000 to 2012, followed by maize (14.4 million ton/year), barley  
119 (9.0 million ton/year), and rice (3.7 million ton/year).

120 Water footprint is a localized index for countries, accounting for the climate, productivity, and irrigation. In this study, we  
121 considered water footprints of all countries in the world, however, a lot of effort should be required for estimating water  
122 footprints of all countries and it was outside the scope of the current study. Therefore, we applied water footprint data of 147  
123 countries, including those in the MENA region, from the study executed by Mekonnen and Hoekstra (2010). The water  
124 footprint for a crop is divided into green and blue water footprints based on the water resources (Hoekstra and Chapagain,

2008). The green water footprint indicates that water supplied by precipitation is retained in the soil of the root zone (Falkenmark, 1995), and blue water footprint is the water stored at the surface or in the ground. Therefore, the green water footprint is related to rain-fed agriculture and the blue water footprint is related to irrigation water provided by aquifers or surface bodies of water. As the water footprint is divided into green and blue water footprints, water saving could be considered as green and blue water saving as well.

**Table 1.** Cultivation area, production, the quantity of crops imported, and internal water resource in the MENA region from 2000 to 2012

## 2.2 Water and lands savings by an international food trade in importing country

Food import is also related to domestic water and lands savings. In particular water saving has a different meaning from virtual water import. For example, Saudi Arabia imported wheat from various exporters and virtual water import indicates the sum of the products obtained from multiplying the quantity of imported wheat by the respective water footprint of each exporter. However, water saving indicates the amount of water needed to produce the same quantity of imported products domestically. Therefore, water saving by wheat import in Saudi Arabia is estimated by multiplying the quantity of imported wheat with the water footprint of wheat in Saudi Arabia.

In this study, we applied green and blue water footprints of crops in each country in the MENA region, as shown in Table 1. However, the availability of water footprint data in the MENA region was limited in some cases. For example, the water footprint of wheat was available in all countries except for Bahrain. Lands saving has the same implication as water savings, thus we calculated lands saving using land footprint of each country in the MENA region, as shown in Table 2. The land footprint indicates the land requirement for producing 1 ton of crops, and it was calculated based on the harvest area and crop production data collected from FAOSTAT (Table 1).

The water and lands savings could be assessed the impacts of failure of trade on domestic water and land requirements in the importing country. Although this assumption about water and land savings considers an extreme trade situation, these results could be used to understand the importance of the international crop trade in the MENA region. In other words, the water and land savings indicated the amount of water and land requirements for crops imported to substitute domestic production, and the water and land savings were calculated as follows,

$$WFP [n_i, c] = \frac{CWR [n_i, c]}{P [n_i, c]} \quad (2)$$

$$LFP [n_i, c] = \frac{Area [n_i, c]}{P [n_i, c]} \quad (3)$$

$$WS [n_i, c] = CI [n_i, c] \times WFP [n_i, c], \quad (4)$$

$$LS [n_i, c] = CI [n_i, c] \times LFP [n_i, c] \quad (5)$$

in which variable  $WFP [n_i, c]$  ( $m^3/ton$ ) is the water footprint of crop  $c$  in the importing country  $n_i$ ,  $CWR$  is the crop water requirement ( $m^3$ ), and  $P$  is the production (ton). Equivalently,  $LFP [n_i, c]$  ( $ha/ton$ ) is the land footprint of crop  $c$  in the importing country  $n_i$ , and  $Area$  is the cultivated area (ha). The symbol  $WS$  ( $m^3$ ) or  $LS$  (ha) indicates the amount of water or land savings in the importing country  $n_i$ .  $CI$  is the import of crop  $c$  in the importing country  $n_i$ .

**Table 2.** Water and lands footprints of four major crops in the MENA region

## 2.3 Degree and eigenvector centralities for analyzing the structure of VWT

### 2.3.1 Nonscaled and scaled in-degree centralities of VWT

Understanding the VWT structure is important for quantifying the amount of import and export because the VWT structure can represent whether it would be sustainable or vulnerable. For example, if a country imports considerable amounts of virtual water through the food trade from just a few exporters, the structure of VWT in this country might be impressionable by exporters. However, if a country is connected with many exporters in VWT, it can have a resilient structure for global changes.

165 A few studies have been conducted on the analysis of the structure of the VWT using a network-based approach (Konar et al.,  
 166 2012; Dalin et al., 2012; Lee et al., 2016). For example, Konar et al (2012) analyzed the characteristics of the network change  
 167 in virtual water trade (VWT), and found that a number of export trade partners followed an exponential distribution in 2000.  
 168 Dalin et al (2012) found that constant organizational features were observed in the network of VWT even though the number  
 169 of trade connections and the volume of VWT has been growing. In addition, Lee et al (2016) analyzed vulnerability of the  
 170 importing countries through the characteristics of network in VWT.

171 In this study, we analyzed the links of the VWT network for identifying the VWT structure using degree centrality, that is the  
 172 number of degree incidents on a given node (Freeman 1979). In addition, the degree centrality is divided into in- and out-  
 173 degree centralities, depending on the direction. In-degree is based on the number of lines (or volume) directed to the node. and  
 174 out-degree is based on the number of lines (or volume) that the node directs to. A node indicates the country in global trade  
 175 network, and incidents mean the trade between countries which can be amounts of products or number of connections, fox  
 176 example if one country exports product to five countries, that country has five incidents. In this study, we focused on the in-  
 177 degree centrality because the MENA region includes representative importing countries. An importer accompanying an  
 178 increased in-degree centrality has expanded connectivity with a large number of exporters, meaning that this importer could  
 179 cope with an accidental disconnection from a certain exporter. In addition, the volume of products exported or imported can  
 180 be applied to incidents as weight of links. In this study, the in-degree centrality, based on the VWT network, is expressed  
 181 according to the nonscaled in-degree centrality (NSInDC), that is based on the number of links, and the scaled in-degree  
 182 centrality (SInDC), that is based on the volume of links.

$$183 \quad NSInDC_i = \sum_j^N Link_{ij}/(N - 1), \quad (6)$$

$$184 \quad SInDC_i = \sum_j^N Flow_{ij}/(N - 1), \quad (7)$$

185 where  $NSInDC_i$  is the nonscaled in-degree centrality of country  $i$ , and  $Link_{ij}$  is the number of links between the  $i$ th and  $j$ th  
 186 countries. The symbol  $SInDC_i$  is the scaled in-degree centrality of country  $i$ , and  $Flow_{ij}$  is the volume of virtual water traded  
 187 between the  $i$ th and  $j$ th countries. Moreover,  $N$  is the total number of countries that trade with a given MENA countries.

188 Through NSInDC and SInDC, we analyzed the vulnerable expansion (or reduction) and robust expansion (or reduction) in the  
 189 VWT network in the MENA region. For example, the vulnerable expansion in the network indicates that the amount of flow  
 190 to a node increases but the number of connections to other nodes decrease. This is represented by high levels of SInDC and  
 191 low levels of NSInDC. The importer country that is associated with vulnerable expansion has an increased quantity of products  
 192 from only a few exporters.

### 193 2.3.2 Eigenvector centralities of VWT

194 In general, connections to nodes which are themselves influential could make a node more influence than connections to less  
 195 influential nodes (Newman, 2016), and eigenvector centrality can be used for measuring the influential connections (Ruhnau,  
 196 2000). For example, the concept of eigenvector centrality has been used by the Web search engine Google in order to rank  
 197 Web pages (Berry and Browne, 2005; Bryan and Leise, 2006; Newman, 2016).

198 In VWT network, the eigenvector centrality could be used for identifying influential countries that could affect the entire  
 199 network. In other words, the entire VWT can be affected by a few influential countries, and it is important to identify these  
 200 countries for understanding and estimating the change of the entire structure of the VWT. An eigenvector centrality can  
 201 measure the influence of each country in the entire VWT, and it is related not only to its own connection pattern but also to  
 202 the connections of other countries to it. Therefore, a country is more influential if it is considered in relation to the countries  
 203 that are influential themselves (Ruhnau, 2000). The eigenvector centrality assigns relative centrality to all of the countries in  
 204 the VWT, based on the principle that connections to high-level centrality countries contribute more to the centrality of the  
 205 countries compared to equal connections to low-level centrality countries (Ruhnau, 2000; Lee et al., 2016). Bonacich (1972)  
 206 defined the centrality ( $x_i$ ) of a node  $i$  as the positive multiple of the sum of adjacent centralities in links (or volume) between

207 nodes ( $A_{ij}$ ). Therefore, if we denote the centrality of vertex  $i$  by  $x_i$ , then we can allow for this effect by making  $x_i$  proportional  
208 to the average of the centralities of  $i$ 's network neighbours (Newman, 2016),

$$209 \quad x_i = \frac{1}{\lambda} \sum_{j=1}^n A_{ij} x_j \quad (8)$$

210 where  $\lambda$  is a constant. Defining the vector of centralities  $x = (x_1, x_2, \dots)$ , we can rewrite this equation in matrix form as

$$211 \quad \lambda x = Ax \quad (9)$$

212 This type of equation is solved using eigenvalues and eigenvectors, where  $A$  is a adjacency matrix of  $A_{ij}$ , and  $\lambda$  is a scalar,  
213 known as the eigenvalue associated with the eigenvector  $c$  defined as a column vector. Eigenvector centrality is determined  
214 by calculating the principal eigenvector that has the largest eigenvalue among all eigenvectors. A non-negative eigenvector  
215 with the maximal eigenvalue exists. We refer to a non-negative eigenvector ( $x \geq 0$ ) of the maximal eigenvalue as the principal  
216 eigenvector, and we call the entry  $x_i$  the eigenvector-centrality of node (country)  $i$  (Ruhnau, 2000).

## 217 **3 Results and Discussion**

### 218 **3.1 Trade-offs between national water-land savings and food security through food trade in the MENA region**

219 This study considered trade-offs between food security and food trade in terms of national resource management. For example,  
220 the increase of domestic food products instead of imports of them could be one policy for food security but additional water  
221 and land for domestic products would be considered at the same time. In other words, food imports could contribute domestic  
222 water and land management, therefore, we estimated the national water and land savings by importing crops as shown in Table  
223 3. In Saudi Arabia, blue water savings by barley, maize, and wheat imports were estimated to 5.0, 2.0 and 0.8 billion  $m^3$ /year,  
224 respectively. In comparison to the internal water resource of Saudi Arabia which is 2.4 billion  $m^3$ /year as shown Table 1 (World  
225 Bank, 2014), the water saving through import of barley, maize, and wheat could be considered as significant amount in Saudi  
226 Arabia. In the case of Egypt, most of the water saving occurred based on the imports of wheat and maize. Approximately 7.5  
227 billion  $m^3$ /year of blue water was saved by importing wheat. Specifically, the internal water resources in Egypt are only 1.8  
228 billion  $m^3$ /year (Table 1), therefore, water scarcity could be an issue for food security policy in Egypt. Lebanon was strongly  
229 influenced by the impact of crop import on land savings. Approximately 0.24 million ha could be saved by crop imports,  
230 comprising 36% of the agricultural area in Lebanon, that indicates that the crop trade in Lebanon has significant benefits in  
231 terms of land resources compared to water resources.

232 Food imports could be regarded as a negative factor in food security, and it is obvious that food security would accompany  
233 water and lands for domestic food products. These results showed that food imports could bring positive impacts on numerous  
234 water and lands savings in the MENA region. However, there are limitations of these results. First, water saving estimated in  
235 this study was based on the hypothetical situation that meat there were no international trade situation, and sometimes it was  
236 larger than the internal water resources in some countries such as Saudi Arabia and Egypt. Additionally, some crops are  
237 required for the specific type of climate but this study assumed that MENA region was suitable for cultivating maize, wheat,  
238 barley, and rice.

239 **Table 3.** The amount of water and land savings through importing crops in the MENA region from 2000 to 2012.

### 240 **3.2 The VWT in the MENA region from 2000 to 2012**

#### 241 *3.2.1 Virtual water import in the MENA region*

242 The total amount of green and blue water imported by each MENA country from 2000 to 2012 respectively reached 921.2 and  
243 80.5 billion  $m^3$  in the MENA region, as shown in Table 4 and Figure 1. The largest volume of green water was imported  
244 annually by Egypt (19.1 billion  $m^3$ /year), followed by Saudi Arabia (11.9 billion  $m^3$ /year). In addition, the largest amount of  
245 blue water was imported annually by Saudi Arabia (1.2 billion  $m^3$ /year), followed by the UAE (0.9 billion  $m^3$ /year). Over 70%

246 of the green water imported annually into the MENA region based on the trade of barley (approximately 8.5 billion m<sup>3</sup>/year)  
247 was occupied by Saudi Arabia. The amount of virtual water imported based on the trade of maize was 13.0 billion m<sup>3</sup>/year,  
248 with Egypt being the primary importer of 31% of the total imported amount into the MENA region.  
249 Generally, rice is cultivated in paddy fields, and the blue water footprint of rice in these fields is larger than other cereal crops  
250 in various countries. For example, the global average of the blue water footprint of rice is 584 m<sup>3</sup>/ton but that for wheat is 343  
251 m<sup>3</sup>/ton (Chapagain and Hoekstra 2011; Mekonnen and Hoekstra 2010). Therefore, the importers of rice also import a lot of  
252 water. Approximately 3.0 billion m<sup>3</sup>/year of blue water were imported in the rice trade from 2000 to 2012, and Saudi Arabia,  
253 UAE, and Iraq, were the primary importers. The largest volume of virtual water imported by the MENA region was owing to  
254 the trade of wheat. The annual amount of virtual water imported based on the trade of wheat in the MENA region from 2000  
255 to 2012 was approximately 42.6 billion m<sup>3</sup>/year, and over 35% of the virtual water imported through the wheat trade was  
256 imported by Egypt (15.7 billion m<sup>3</sup>/year). However, the amount of blue water was only 2.0 billion m<sup>3</sup>/year because the green  
257 water footprint is much larger than blue water footprint in main exporters such Russian fed, Australia, and Canada that might  
258 indicate wheat has been cultivated in rain-fed area with less irrigation.

259 We also estimated the amount of virtual water imported per capita (VWicap), as shown in Figure 2, which shows the differing  
260 viewpoints regarding food and water securities. If we consider only the total amount of imported virtual water, the UAE may  
261 not be considered to be a significant importer because the population and area of UAE is much smaller than those of the MENA  
262 other countries, such as Saudi Arabia. However, the virtual water import per capita in the UAE is larger than that of Saudi  
263 Arabia, thus indicating that the dependency on virtual water imported from exporters in the UAE is much more significant  
264 than in Saudi Arabia. For example, the VWicap was 1266.6 m<sup>3</sup>/cap/year in the UAE, which was the largest value in the MENA  
265 region. The UAE is strongly dependent on the import of virtual water, even though the UAE imports only 4.2 billion m<sup>3</sup>/year  
266 of virtual water. The VWicap increased significantly in Saudi Arabia and Libya from 2000 to 2012. Saudi Arabia and Libya  
267 imported approximately 453.4 and 497.8 m<sup>3</sup>/cap/year, respectively, of virtual water more in 2012 than in 2000. Saudi Arabia  
268 was the second largest importer in the MENA region, and its VWicap was also the fifth highest in the MENA region.

269 **Table 4.** The amount of green and blue water imported in the MENA region from 2000 to 2012.

270 **Figure 1.** The total amount of virtual water imported by each country in the MENA region from 2000 to 2012, separated into  
271 green (upper) and blue (lower) water

272 **Figure 2.** Virtual water imported per capita in the MENA region from 2000 to 2012.

### 273 3.2.2 Virtual water export to the MENA region

274 We also focused on the volume of virtual water exported to the MENA region by each exporter from 2000 to 2012, as shown  
275 in Figure 3. Based on the trade of barley, Ukraine exported 41.1 billion m<sup>3</sup> of green water to the MENA region that amounted  
276 to 27% of the total green water imported in the MENA region. In terms of blue water traded through barley, five exporters  
277 (Germany, Australia, the Russian Federation, Ukraine, and India) provided 78% of the total blue water imported in the MENA  
278 region based on barley. Based on the trade of maize, Argentina contributed 40% of the total amount of green water imported  
279 by the MENA region based on maize, but the blue water imported by the MENA region was primarily from the USA. Based  
280 on the trade of rice, the major virtual water exporters to the MENA region were India, Thailand, and Pakistan. In particular,  
281 30.4 billion m<sup>3</sup> of blue water were imported from these countries from 2000 to 2012, which comprised 78% of the blue water  
282 imported by the MENA region based on rice. Wheat was the most representative crop imported by the MENA region. The  
283 Russian Federation and the USA provided 25% (140.6 billion m<sup>3</sup>) and 21% (111.2 billion m<sup>3</sup>) of the total amount of green  
284 water imported in the MENA region based on the trade of wheat in 2000 to 2012, respectively, and the remaining 55% was  
285 divided among several exporters, including Australia, Canada, France, and Ukraine.

286 **Figure 3.** Quantities of green water export (GWE) and blue water export (BWE) from the primary exporters to the MENA  
287 region from 2000 to 2012

288 **3.3 The temporal change of VWT structure in the MENA region**

289 From 2000 to 2012, both the volume and connectivity of VWT was changed. For example, the virtual water imported in the  
290 MENA region slightly increased and the VWT was distributed with more exporters in 2006, as shown in Figure 4. However,  
291 the volume of virtual water imported in the MENA region was increased more than 50 % from 2006 to 2012 but the distribution  
292 of VWT seemed to consistent. In case of Lebanon, VWT in Lebanon was strongly dependent on the USA, Argentina, and  
293 Australia. However, Lebanon expended the VWT in 2006 and Russian Federation, Turkey, and Kazakhstan, contributed to  
294 virtual water imports in Lebanon, as shown in Figure 4. Accordingly, the structure of VWT in Lebanon approached a  
295 distributed network. However, the VWT in 2012 showed that it was dominated by Ukraine and Russian Federation, though  
296 Lebanon imported more virtual water in 2012 than 2006.

297 **Figure 4.** Virtual water imports at the MENA region and Lebanon in 2000, 2006, and 2012

298

299 These changes are more related to the structure of VWT and the MENA region should consider not only the amount of virtual  
300 water but also the structure of VWT for sustainable food security subject to the condition of a strong dependency on crop  
301 import. Therefore, we analyzed the degree centralities of NSInDC and SInDC from 2000 to 2012 in the MENA region, and  
302 identified the countries who had the vulnerable expansion or reduction in the VWT network. Figure 5 shows the NSInDC and  
303 SInDC patterns in the VWT network in accordance to each country in the MENA region. If the specific country has both large  
304 NSInDC and small SInDC, this country has connections with various exporters but imports a small amount of virtual water.  
305 Specifically, Egypt and Yemen showed that NSCInD was lower but SInDC was higher than other countries, thus indicating  
306 the intensive connectivity with a few exporters. In contrast, Saudi Arabia had larger SInDC than other countries expect for  
307 Egypt, while the NSCInD was also highest of the MENA region. Accordingly, Saudi Arabia had a more distributed structure  
308 regarding VWT. UAE and Iraq had similar SInDC in 2012 but NSInDC was quite different (UAE (0.46) and Iraq (0.27)).  
309 Furthermore, SInDC in Morocco (96.45) was larger than UAE (83.41) but NSInDC in Morocco (0.26) was smaller than UAE  
310 (0.46). In comparison to UAE, Morocco had intensive connections with fewer exporters compared to UAE.

311 Based on the temporal changes of NSInDC and the SInDC during two periods (2000–2006 and 2006–2012), the MENA region  
312 countries were divided into four types (I–IV), as shown in Figure 6. The x-axis indicates the NSInDC and the y-axis indicates  
313 the SInDC. Type I countries is located at higher levels both in the x-axis and y-axis, and show a robust expansion in the virtual  
314 water import. Additionally, the countries in this type increased the connectivity and volume of virtual water imported,  
315 simultaneously. Type II countries increased the volume of virtual water imported without expansion of connectivity. Type III  
316 countries showed reductions in the virtual water import with reduction of connectivity, and type IV countries has established  
317 connections with more exporters but has decreased virtual water imports.

318 In the early 2000s, most of countries in the MENA region expanded their trade structure by increasing both the connectivity  
319 to the exporters and the volume of the imported virtual water. In Bahrain, Omen, Qatar, Yemen, Saudi Arabia, Lebanon, and  
320 UAE, the NSInDC of the VWT network increased significantly from 2000 to 2006, which means that the trade connectivity  
321 expanded. The expanded structure of the VWT indicates that the MENA countries were connected to various exporters, and  
322 that this structure can be a resilient structure for global changes. In particular, the import of food crops is an essential factor in  
323 food security in the MENA region, even if food self-sufficiency is increased by increasing domestic production. However,  
324 Egypt had the largest SInDC but NSInDC was ranked 6th among the MENA region countries. In 2006, Egypt and Saudi Arabia  
325 both expanded the connectivity in the VWT network, as shown by the increasing NSInDC. However, the type of VWT structure  
326 in many MENA countries such as Yemen, Qatar, Bahrain, and Lebanon has moved to Type II which means that the countries  
327 increased the volume of the imported virtual water, but the number of exporters that linked to the MENA countries decreased  
328 from 2006 to 2012. In particular, in 2012, most countries kept their connectivities or reduced them, except for Algeria, Iraq,  
329 Libya, and UAE. These results indicate that the dependence of the MENA region on virtual water import increased rapidly



330 recently with the large increase in the imported volume of virtual water. However, the connectivity of the VWT in the MENA  
331 region has not increased as much as the volume of virtual water imported increased.

332 The degree centrality in this study could be useful for identifying the connectivity and volume of trade of each country, but it  
333 is limited to show the influence of each country on entire trade network, thus we estimated eigenvector centrality, as shown  
334 on Figure 7. In 2000, Egypt and Saudi Arabia were identified as the most influential importers in the MENA region, and the  
335 USA and Australia were the most influential exporters. Accordingly, the entire VWT in the MENA region could be affected  
336 by these importers and exporters. This means that the change of the trade policy or food management in these countries could  
337 change the structure of VWT in the MENA region. In 2006 and 2012, the influential countries in the MENA region were still  
338 Egypt and Saudi Arabia, but the influential exporters moved to the Russian Federation, Ukraine, and Brazil.

339 **Figure 5.** Nonscaled and scaled in-degree centralities of each country in the MENA region in 2000, 2006, and 2012

340 **Figure 6.** Country types in the MENA region according to the changes of nonscaled and scaled in-degree centralities

341 **Figure 7.** Eigenvector centrality of virtual water trade network in the MENA region at 2000, 2006, and 2012

### 342 **3.4 Importance and limitations of water footprint and VWT in the MENA region from a policy perspective**

343 Generally, the VWT is more related to resource management in exporting countries rather than importing countries because  
344 the embedded water in food trade indicates water resources that are consumed for producing food products in the exporting  
345 country. However, VWT is also considered as an important issue in importing countries in terms of water and food security.  
346 For example, the reduction of VWT might be related to water consumption by replacing imported food products by domestic  
347 food products.

348 However, the application of the concept of VWT is under critical discussion (Wichelns, 2010). First, water footprints formulate  
349 new concepts of water management, but we need to realize that water footprint can be changed due to various factors such  
350 water requirement, productivity, production system, development of technologies, fertilizer usage, and irrigation scheduling  
351 and operations of the water facilities.

352 Second, VWT could contribute to the connection of water management to food security. However, food trade is affected by  
353 the scarcity or affluence of other important resources, such as capital, labor, and land (Biewald et al., 2014). In particular,  
354 economic values, such as the price of food products, are the main driver in global food trade, but there is no global value  
355 established for virtual water. Therefore, it is difficult to apply virtual water to trade policy in terms of the economic efficiency.  
356 Therefore, policy makers or resource managers in the MENA region should not only consider the effects of VWT but also the  
357 difficulty in adapting virtual water to policies for resource management.

358 Third, there are spatial and temporal issues of VWT in the study. The VWT could be affected by geopolitical issues such as  
359 topography, and distances between importers and exporters. For example, the changes of exporting countries in the MENA  
360 region could be related to energy use for transporting products, thus trade policy should consider the economic benefit or cost  
361 of transportation. Therefore, the VWT should be discussed with geopolitical issues such as benefit and cost of transportation.  
362 In addition, VWT and water-lands savings by food trade in this study were calculated based on historical database, thus it was  
363 difficult to apply the results to future policy.

364 Despite these limitations, we believe that virtual water has a role in the achievement of sustainable water, land, and food  
365 security, even if there are limitations and difficulties in applying the virtual water concept. As mentioned above, the VWT can  
366 be a major resource in the MENA region. Accordingly, vulnerable VWT, for example, low connectivity, can be a risk element  
367 for future food security risk management. In particular, the MENA region is strongly dependent on food products from  
368 exporting countries which implies a strong dependency on water resource from exporting countries. Therefore, water shortages  
369 or low-food production in exporting countries might cause increasing food prices in the MENA region, but also increasing  
370 domestic water use for increasing domestic food production. The primary resources of water, energy and food are naturally  
371 interlinked. The degree of their interlinkages in the MENA is exceptionally high, thus creating a higher degree of risks and

372 vulnerability. Therefore, understanding these interlinkages and quantifying them in an attempt to better understand this  
373 complex system of systems is crucial. This requires the synergistic effort of multiple disciplines, including contributions from  
374 various technologies, science, policies, health, communication, and economics, at local processes and system level scales. In  
375 this study, we believe that the VWT in the MENA region can be the key factor for bridging water and food, and it is important  
376 to quantify the influence of trade on water and food management. In addition, this study revealed vulnerability (or robust)  
377 expansion (or reduction) and influential traders in the VWT network in the MENA region, based on in-degree and eigenvector  
378 centrality indices. If a country in the MENA region has low connectivity but an increased import of virtual water, this country  
379 should re-evaluate their vulnerable trade structure and change the trade policy or water-food management.

#### 380 **4. Conclusions**

381 The import of water in virtual form based on VWT could develop into a major water portfolio that dominates water  
382 management in the water-scarce countries of the MENA region. In water-deficit areas, such as the MENA region, the VWT  
383 can offer new perspectives for understanding and solving water stress and scarcity. In summary, this study showed that the  
384 significant water in comparison to internal water resource could be saved by food trade in the MENA region, and policy makers  
385 can benefit by considering both the quantitative impacts of VWT and the structural changes of VWT, such as vulnerable  
386 expansion (or reduction) in the MENA region. For example, when a country in the MENA region set a plan for increasing  
387 food security, this country first should identify the amount of water and land savings that can be achieved by food import, and  
388 consider the trade-off between food security and food import. In addition, the stable trade could be a component for stable  
389 food supply in the MENA region, thus this study contributes to the understanding of the dependency on each trade partner for  
390 countries in the MENA region and can help with setting the food trade policy in terms of extension (or reduction) of trade  
391 partners and increase (or decrease) in volume of trade.

392 However, this study only focused on food trade and water-land savings, thus energy part was not considered. The MENA  
393 region represents an extreme case globally in terms of water and energy resources, for example, 66% of the world's known  
394 crude oil reserves, but only 1.4% of the world's fresh water supplies is attributed to the region (Khater, 2001). The increase or  
395 decrease of water withdrawal for irrigation is related to the energy used for water extraction such as pumping surface or ground  
396 water. For example, 5 % or more of the total electricity consumption can be attributed to water pumping in Saudi Arabia  
397 (Siddiqi and Anadon, 2011). Energy use for food production and water supply could be the main factor in integrated resource  
398 management in the MENA region, and the lack of energy part was a limitation in this study.

399 In spite of this limitation, the intensity and connectivity of VWT, which were analyzed in this study, can be the major  
400 components needed for integrating resources management in the MENA region. Accordingly, VWT is regarded as the  
401 important factor in determining food security and water-lands management, and it can be a useful interlinking parameter among  
402 resources in WEF Nexus approach, which identify key issues in food, water, and energy securities through the lens of  
403 sustainability, seeking to predict and protect against future risks and resource insecurities (Biggs et al., 2015). The core of the  
404 Nexus concept is that the production, consumption, and distribution of water, energy, and food, are inextricably interlinked,  
405 thus this study would provide important information to policy makers for evaluating scenarios about integrated resource  
406 management toward sustainability in the MENA region.

#### 407 **References**

- 408 Abahussain, A.A., Abdu, A.S., Al-Zubari, W.K., El-Deen, N.A., and Abdul-Raheem, M.: Desertification in the Arab Region:  
409 analysis of current status and trends. *Journal of Arid Environments*, 51(4), 521-545, 2002.
- 410 Aldaya, M.M., Allan, J.A., and Hoekstra, A.Y.: Strategic importance of green water in international crop trade. *Ecological*  
411 *Economics*, 69, 887-894, 2010.

412 Allan, J.: Fortunately there are substitutes for water otherwise our hydro-political futures would be impossible In: Priorities  
413 for water resources allocation and management, ODA, London 13-26, 1993.

414 Antonelli, M., Laio, F., and Tamea, S.: Food security and VWT in the Middle East and North Africa. *International Journal of*  
415 *Water Resources Development*, 31(3), 326-342, 2015.

416 Bazilian, M., Rogner, H., Howells, M., Hermann, S., Arent, D., Gielen, D., ... and Yumkella, K.K.: Considering the energy,  
417 water and food nexus: Towards an integrated modelling approach. *Energy Policy*, 39(12), 7896-7906, 2011.

418 Berry, M. W., and Browne, M.: Understanding search engines: mathematical modeling and text retrieval, *SIAM* (17), 2005.

419 Biewald, A., Rolinski, S., Camoen, H.L., Schmitz, C., and Dietrich, J.P.: Valuing the impact of trade on local blue water.  
420 *Ecological Economics*, 101, 43-53, 2014.

421 Biggs, E.M., Bruce, E., Boruff, B., Duncan, J.M., Horsley, J., Pauli, N., ... and Haworth, B.: Sustainable development and  
422 the water–energy–food nexus: A perspective on livelihoods. *Environmental Science & Policy*, 54, 389-397, 2015.

423 Bryan, K., and Leise, T.: The \$25,000,000,000 eigenvector: The linear algebra behind Google. *SIAM review*, 48(3), 569-  
424 581, 2006.

425 Chapagain, A.K., and Hoekstra, A.Y.: The blue, green and grey water footprint of rice from production and consumption  
426 perspectives. *Ecological Economics*, 70 (4), 749-758, 2011.

427 Chapagain, A.K., Hoekstra, A.Y., and Savenije, H.H.G.: Water saving through international trade of agricultural  
428 products. *Hydrology and Earth System Sciences Discussions*, 10(3), 455-468, 2006.

429 Dalin, C., Konar, M., Hanasaki, N., Rinaldo, A., and Rodriguez-Iturbe, I.: Evolution of the global VWT network. *Proc. Natl.*  
430 *Acad. Sci. U.S.A.*, 109(16), 5989-5994, 2012.

431 Fader, M., Gerten, G., Thammer, M., Heinke, J., Lotze-Campen, H., Lucht, W., and Cramer, W.: Internal and external green-  
432 blue agricultural water footprints of nations, and related water and land savings through trade. *Hydrology and Earth System*  
433 *Sciences*, 15, 1641-1660, 2011.

434 Falkenmark, M.: Land-water linkages: a synopsis. *Land and Water integration and river basin management. FAO Land and*  
435 *Water Bulletin*, 1, 15-16, 1995.

436 Falkenmark, M., and Lannerstad, M.: Food security in water-short countries- Coping with carrying capacity overshoot.  
437 *Fourth Botin Foundation Water Workshop*, 2010.

438 Food and Agriculture Organization of the United Nations (FAO): on-line database. Retrieved from  
439 <http://www.fao.org/nr/water/aquastat/main/index.stm>, 2014.

440 Freeman, L.C.: Centrality in social network: conceptual clarification. *Social Networks*, 1, 215-239, 1979.

441 Gleick, P. H.: The world's water 2000–2001. The biennial report on freshwater resources, 19-38, 2000.

442 Government Office for Science, London.: Foresight. *The Future of Food and Farming*, 2011.

443 Hanjra, M., and Qureshi, M.: Global water crisis and future food security in an era of climate change, *Food Policy*, 35, 365–  
444 377, 2010.

445 Hennessy, K. B., Fitzharris, B., Bates, B. C., Harvey, N., Howden, M., Hughes, L., ... and Warrick, R.: Australia and New  
446 Zealand: climate change 2007: impacts, adaptation and vulnerability: contribution of Working Group II to the Fourth  
447 Assessment Report of the Intergovernmental Panel on Climate Change, 2007.

448 Hoekstra, A.Y.: VWT: Proceedings of the international expert meeting on VWT. *Value of Water Research Series No.12*,  
449 UNESCO-IHE: Delft, the Netherland, 2003.

450 Hoekstra, A.Y., and Chapagain, A.K.: *Globalisation of Water: Sharing the Planet's Freshwater Resources*. Blackwell  
451 Publishing, 2008.

452 Hoekstra, A.Y., and Hung, P.Q.: Globalisation of water resources: international virtual water flows in relation to crop trade.  
453 *Global Environment Change*, 15, 45-56, 2005.

454 Immerzeel, W., Droogers, P., Terink, W., Hoogeveen, J., Hellegers, P., Bierkens, M., and van Beek, R.: Middle-East and  
455 Northern Africa water outlook. World Bank Study. Future Water Report, 98, 2011.

456 Konar, M., Dalin, C., Hanasaki, N., Rinaldo, A., and Rodriguez-Iturbe, I.: Temporal dynamics of blue and green VWT  
457 networks. *Water Resources Research*, 48(7), 2012.

458 Lee, S.H., Mohtar, R.H., Choi, J.Y., and Yoo, S.H.: Analysis of the characteristics of the global VWT network using degree  
459 and eigenvector centrality, with a focus on food and feed crops. *Hydrology and Earth System Sciences*, 20(10), 4223, 2016.

460 Lee, S.H., Taniguchi, M., Mohtar, R., Choi, J.Y., and Yoo, S.H.: An Analysis of the Water-Energy-Food-Land Requirements  
461 and CO<sub>2</sub> Emissions for Food Security of Rice in Japan. *Sustainability*, 10(9), 3354, 2018.

462 Lezzaik, K., Milewski, A., and Mullen, J.: The groundwater risk index: Development and application in the Middle East and  
463 North Africa region. *Science of The Total Environment*, 628, 1149-1164, 2018.

464 Mekonnen, M.M., and Hoekstra, A.Y.: The green, blue and grey water footprint of crops and derived crop products. *Value*  
465 *of Water Research Series No.47*, UNESCO-IHE: Delft, the Netherland., 2010.

466 Milly, P. C., Dunne, K. A., and Vecchia, A. V.: Global pattern of trends in streamflow and water availability in a changing  
467 climate. *Nature*, 438(7066), 347-350, 2005.

468 Mohtar, R.H., and Daher, B.: A platform for trade-off analysis and resource allocation: the water-energy-food nexus tool and  
469 its application to Qatar's food security [part of the 'Valuing Vital Resources in the Gulf'series]. Chatham House, 2014.

470 Newman, M.E.: *Mathematics of networks*. The new Palgrave dictionary of economics, 1-8, 2016.

471 Novo, P., Garrido, A., and Varela-Ortega, C.: Are virtual water "flows" in Spanish grain trade consistent with relative water  
472 scarcity?. *Ecological Economics*, 68, 1454-1464, 2009.

473 Oki, T., and Kanae, S.: VWT and water resource. *Water Science & Technology*, 49(7), 203-209, 2004.

474 Porter, J.R., Xie, L., Challinor, A.J., Cochrane, K., Howden, S.M., Iqbal, M.M., ... and Ingram, J.: Food security and food  
475 production systems. 2014.

476 Rastoin, J.L., and Cheriet, F.: Food security in the Mediterranean: a major geostrategic issue. Paris: Ipemed, Les Notes  
477 d'Ipemed, Etudes & Analyses, 6-2010, 2010.

478 Rasul, G.: Food, water, and energy security in South Asia: a nexus perspective from the Hindu Kush Himalayan  
479 region. *Environmental Science & Policy*, 39, 35-48, 2014.

480 Saladini, F., Betti, G., Ferragina, E., Bouraoui, F., Cupertino, S., Canitano, G., ... and Bidoglio, G.: Linking the water-  
481 energy-food nexus and sustainable development indicators for the Mediterranean region. *Ecological Indicators*, 91, 689-697,  
482 2018.

483 Schyns, J.F., and Hoekstra, A.Y.: The Added Value of Water Footprint Assessment for National Water Policy: A Case Study  
484 for Morocco. *Plos ONE*, 9(6), e99705, 2014.

485 Siddiqi, A., and Anadon, L.D.: The water-energy nexus in Middle East and North Africa. *Energy policy*, 39(8), 4529-4540,  
486 2011.

487 Tolba, M. K., and Saab, N. W.: Arab environment: Climate change. In Beirut, Arab Forum for Environment and  
488 Development, 2009.

489 Wichelns, D.: Virtual water: A helpful perspective, but not a sufficient policy criterion. *Water Resources*  
490 *Management*, 24(10), 2203-2219, 2010.

491 World Bank.: *Water in the MENA region: Management Perspectives and Innovations*, edited by N. Vijay Jagannathan,  
492 Ahmed Shawky Mohamed, Alexander Kremer. Washington DC: World Bank, 2009.

493 Yang, H., Wang, L., Abbaspour, K.C., and Zehnder, A.J.B.: VWT: an assessment of water use efficiency in the international  
494 food trade. *Hydrology and Earth System Sciences*, 10, 443-454, 2006.

495

496  
497  
498

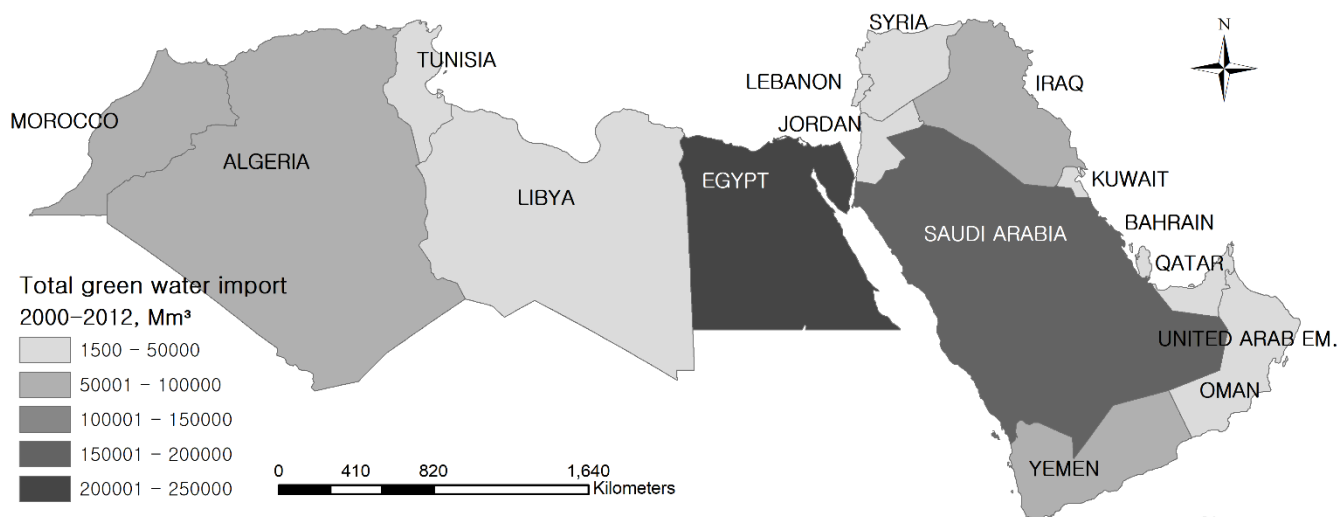

499  
500

(a) Green water imports

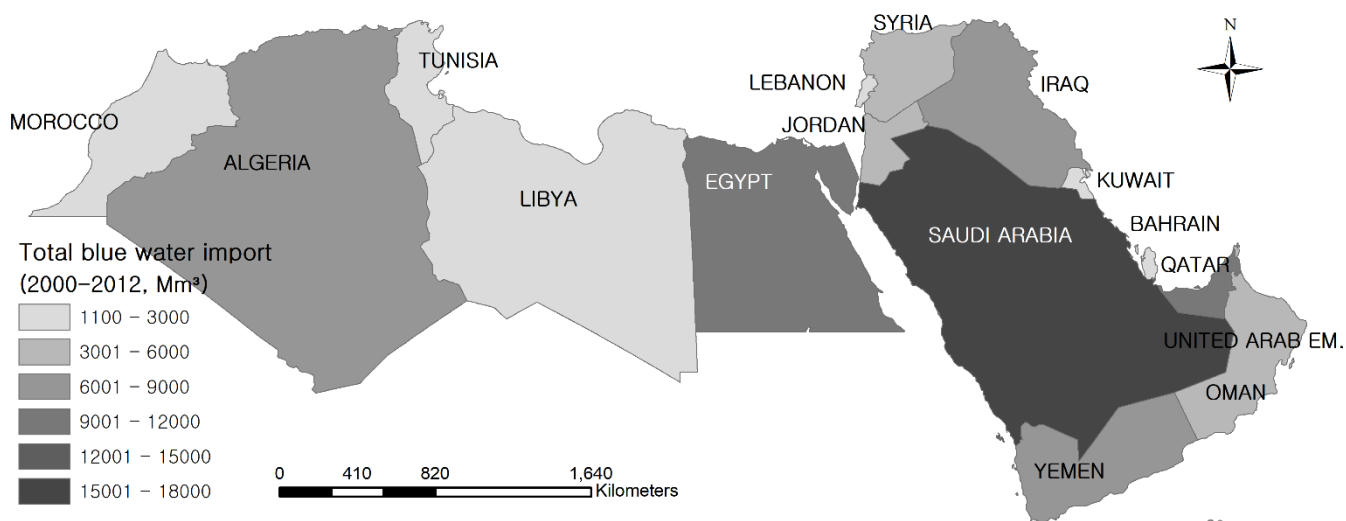

501  
502

(b) Blue water imports

503 **Figure 1.** Total amount of virtual water imported by each country in the MENA region from 2000 to 2012 classified into  
504 green (upper) and blue (lower) water

505

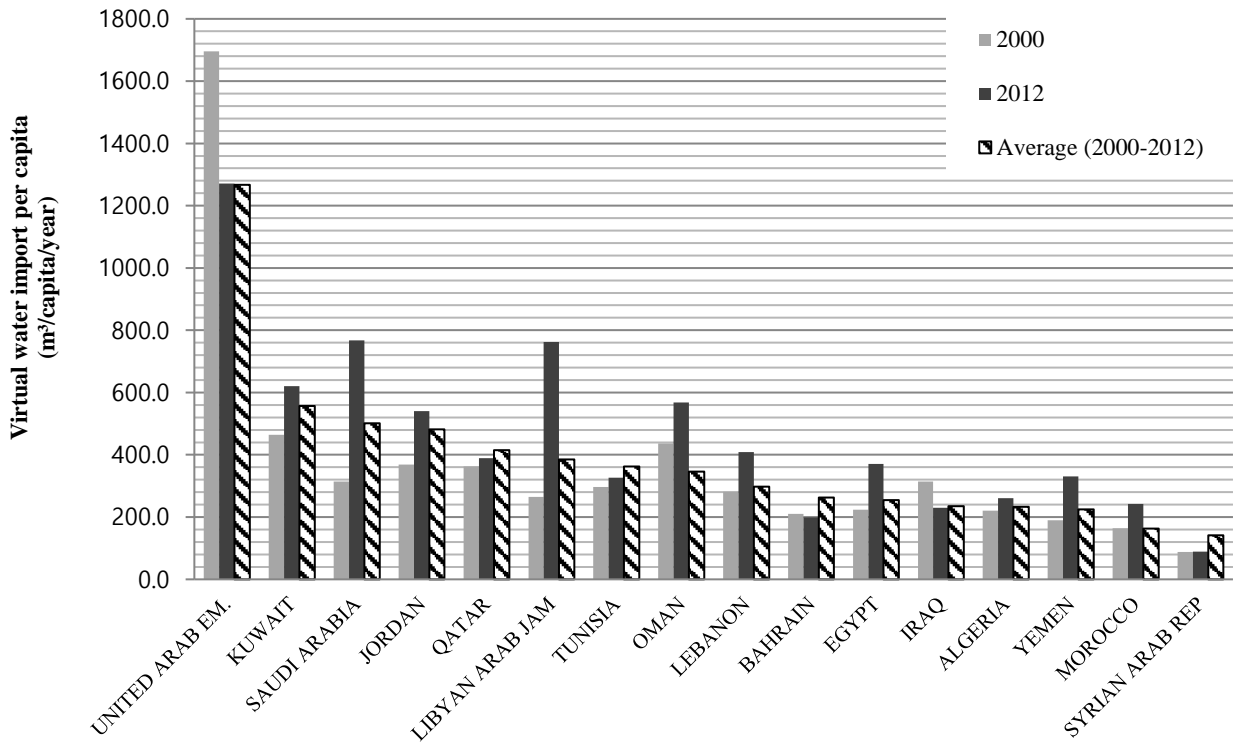

**Figure 2.** Virtual water imported per capita in the MENA region from 2000 to 2012

506

507

508

Barley

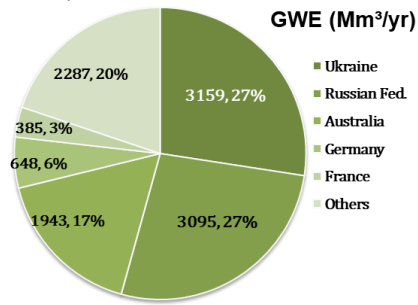

Maize

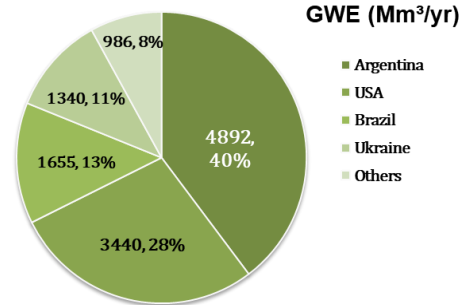

Wheat

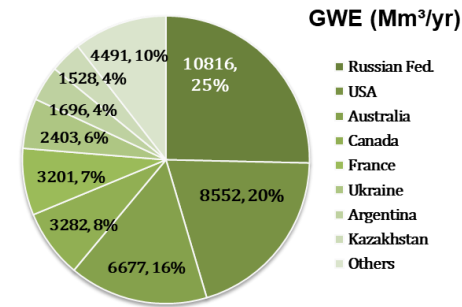

Rice

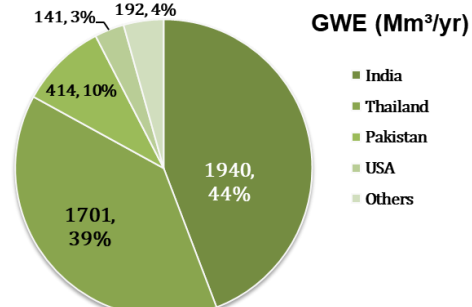

(a) Annual green water export (GWE) during 2000-2012

Barley

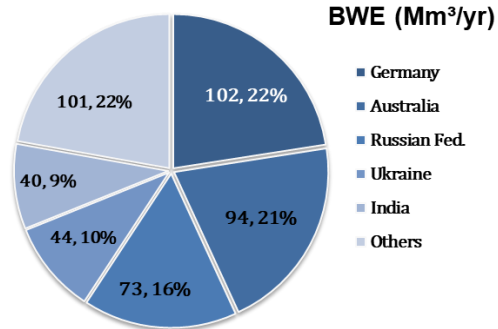

Maize

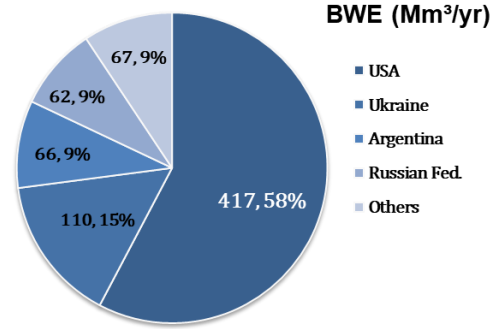

Wheat

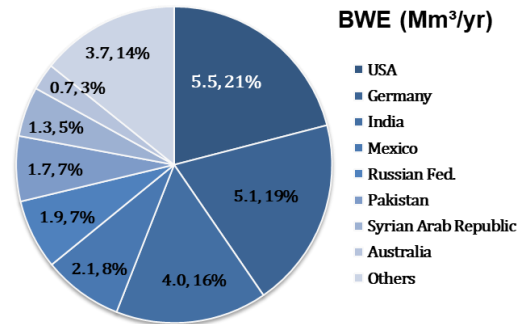

Rice

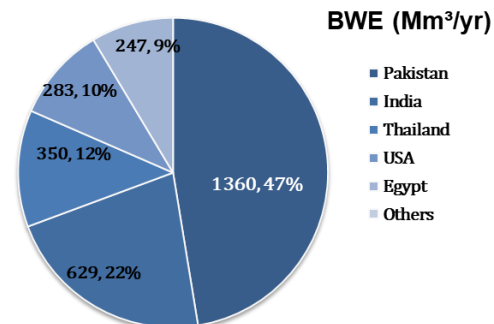

(b) Annual blue water export (BWE) during 2000-2012

**Figure 3.** Quantities of annual green water exports (GWE) and blue water exports (BWE) from the primary exporters to the MENA region from 2000 to 201

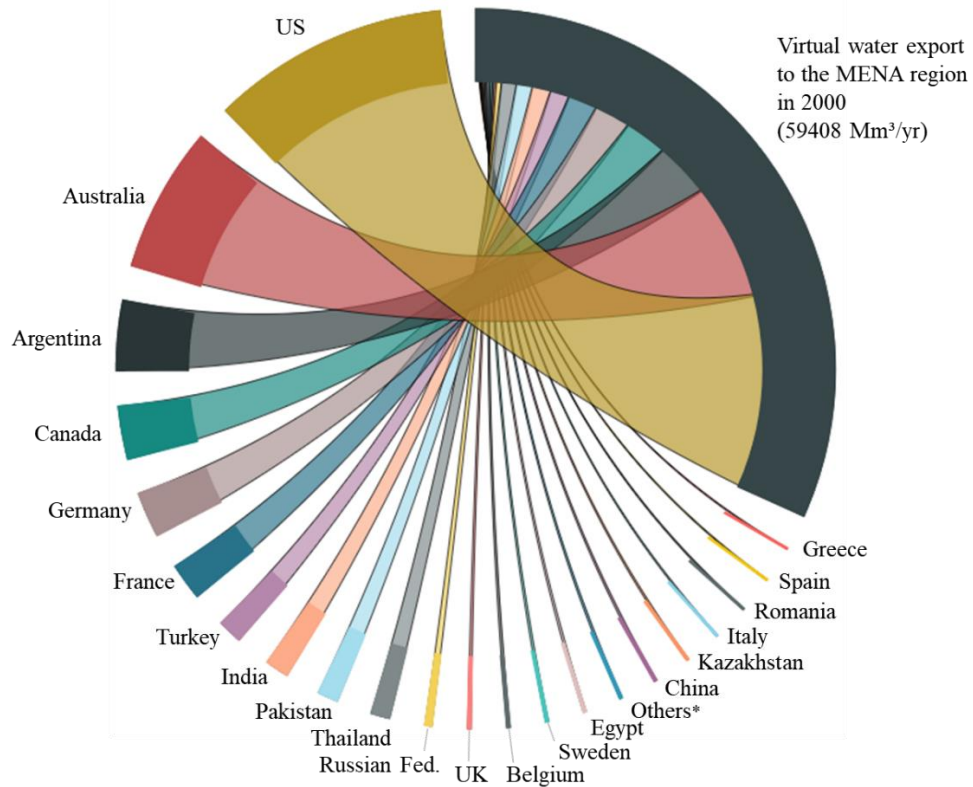

(a) MENA region in 2000

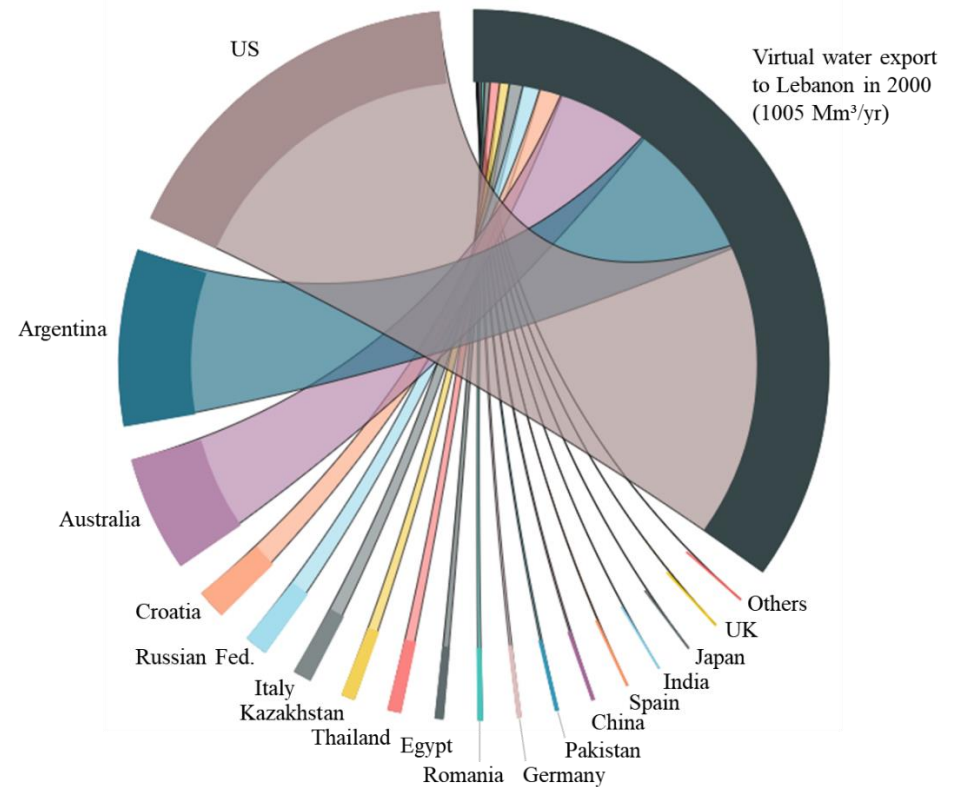

(b) Lebanon in 2000



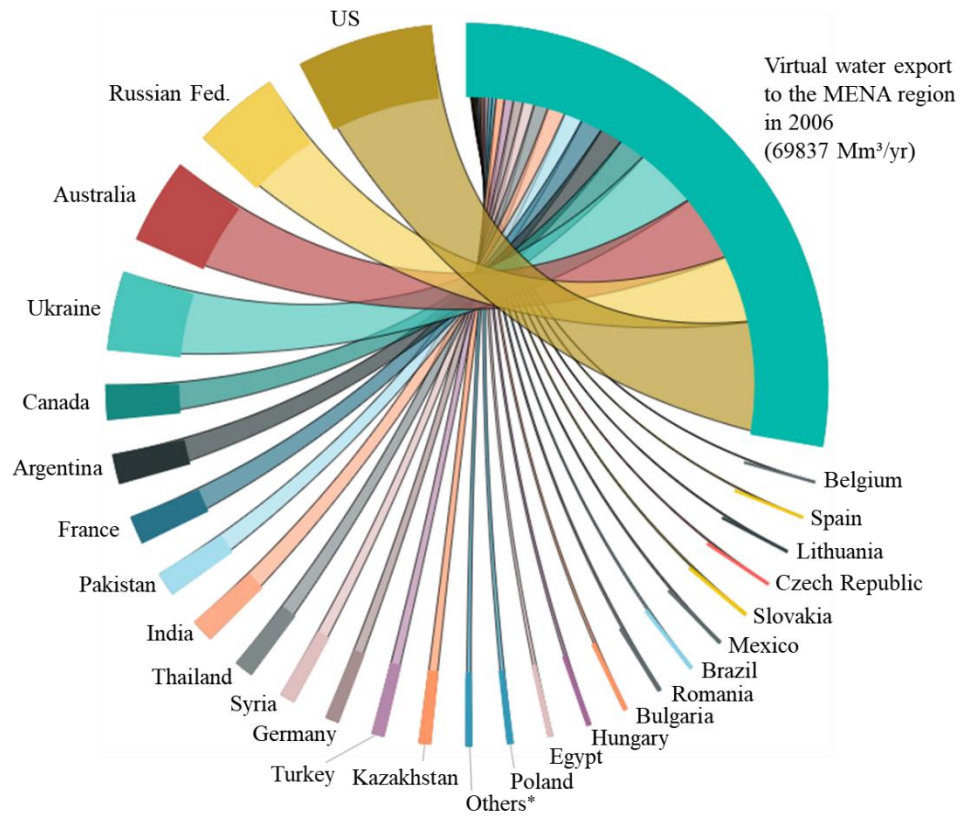

(c) MENA region in 2006

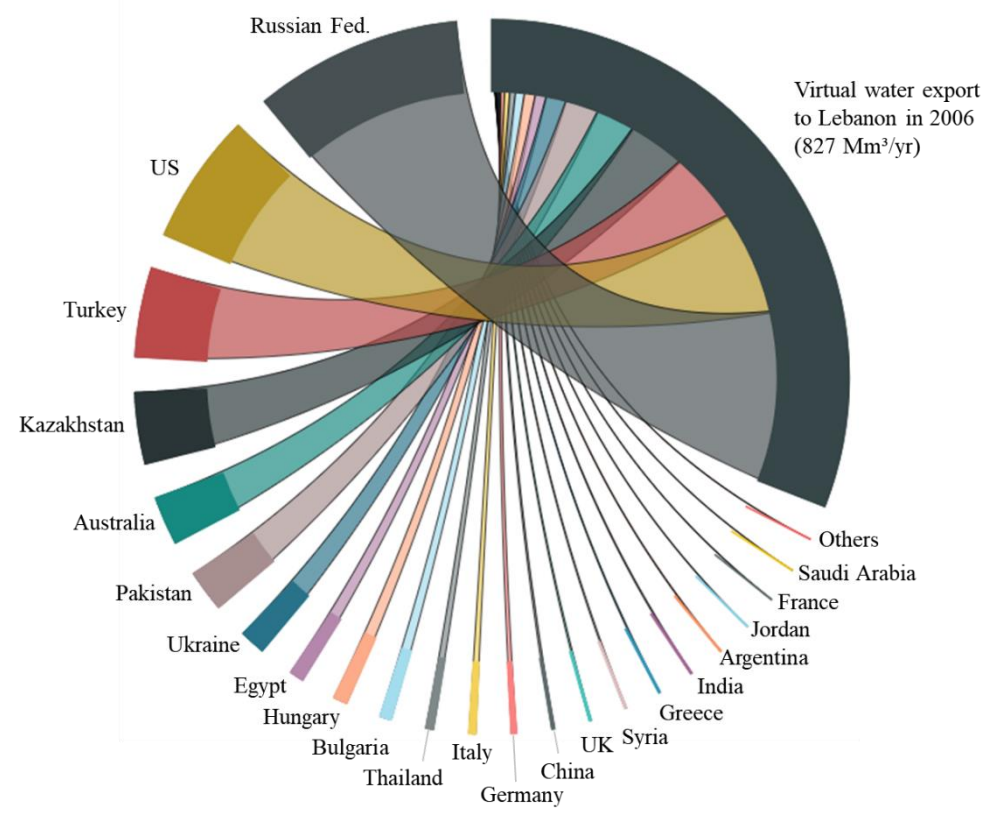

(d) Lebanon in 2006

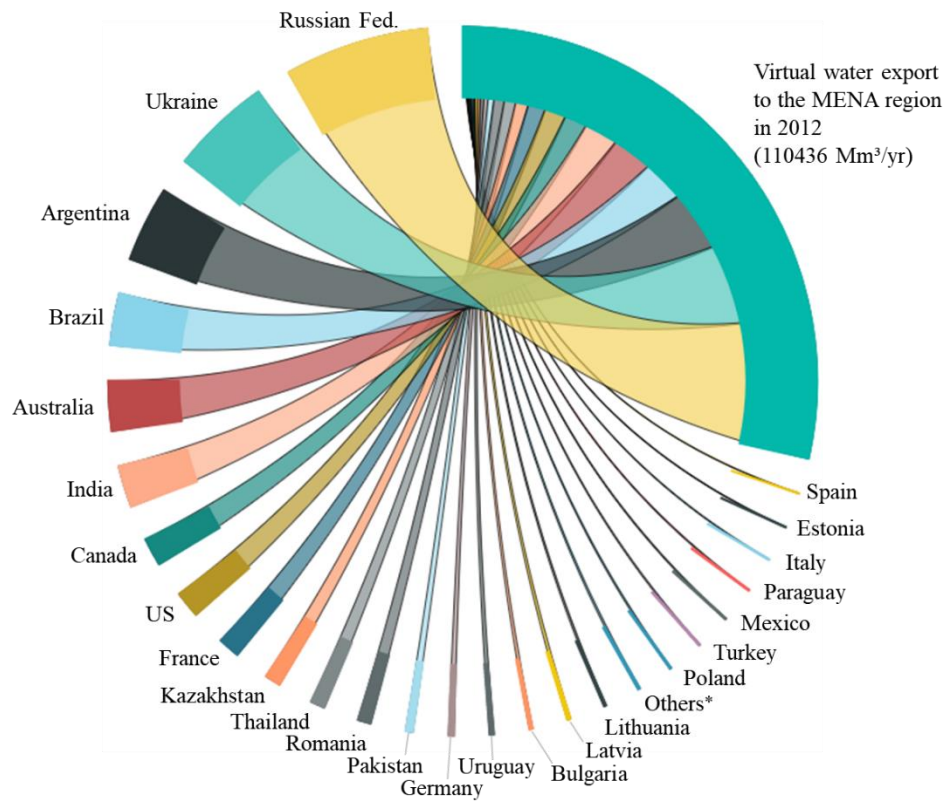

(e) MENA region in 2012

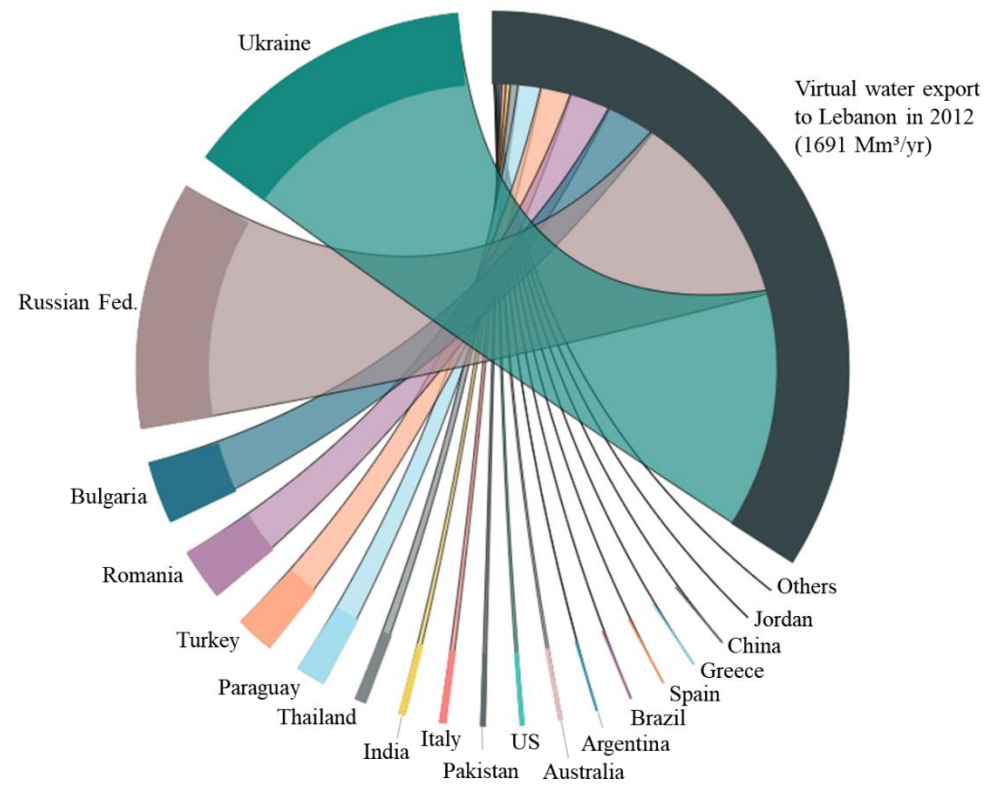

(f) Lebanon in 2012

514  
515  
516  
517

**Figure 4.** Virtual water imports at the MENA region and Lebanon in 2000, 2006, and 2012. Others indicate the countries who export less than 100 Mm³/yr to the MENA region or Lebanon

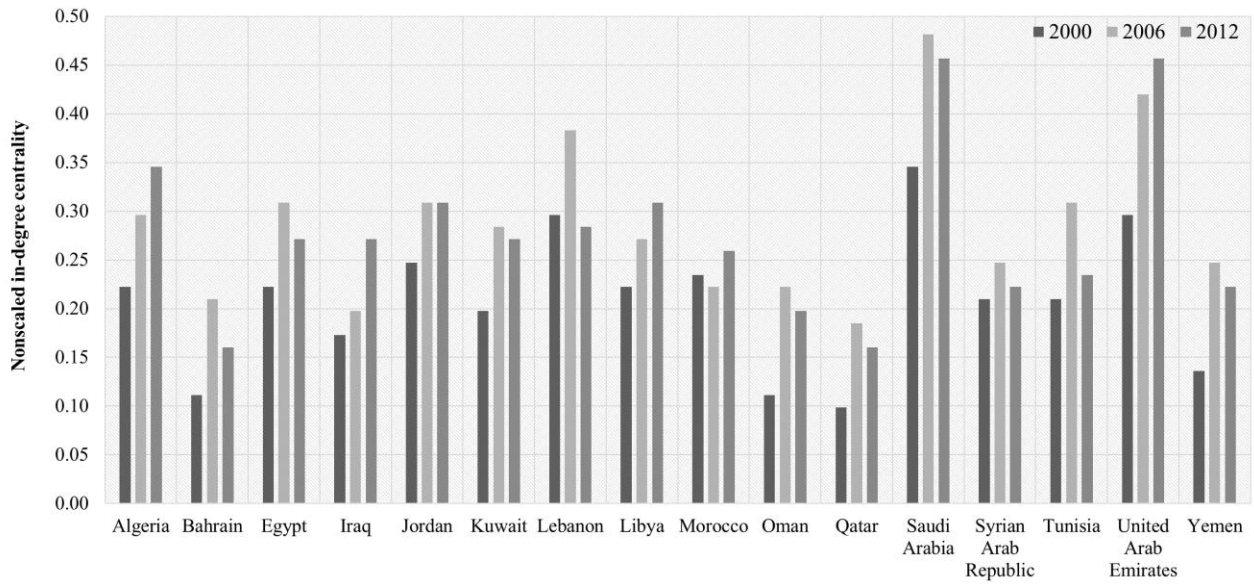

(a) Nonscaled in-degree centrality

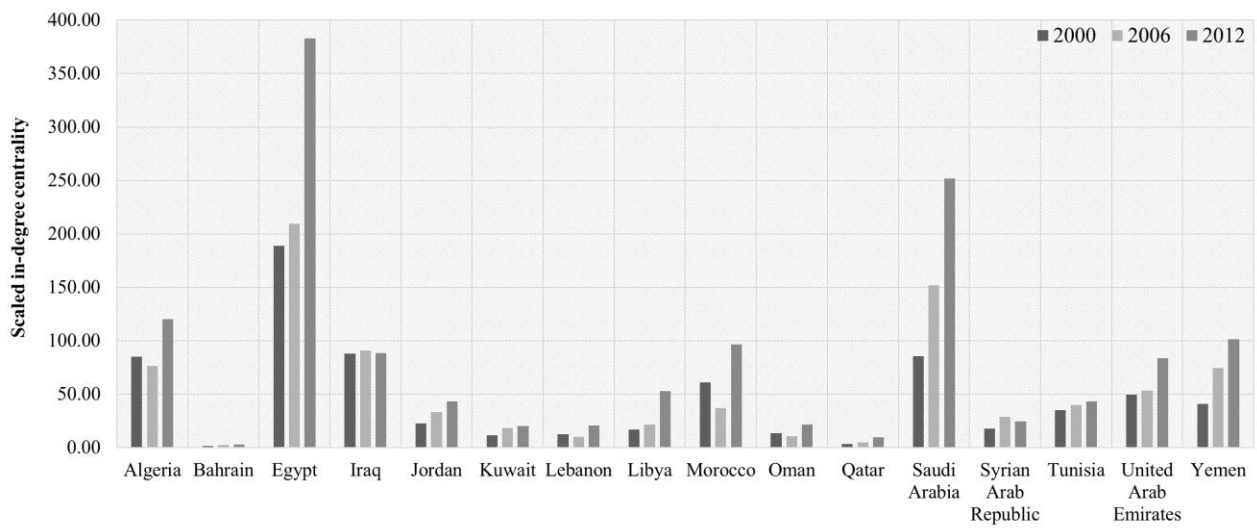

(b) Scaled in-degree centrality

**Figure 5.** Nonscaled and scaled in-degree centralities of each country in the MENA region in 2000, 2006, and 2012

518  
519  
520

521  
522  
523  
524  
525

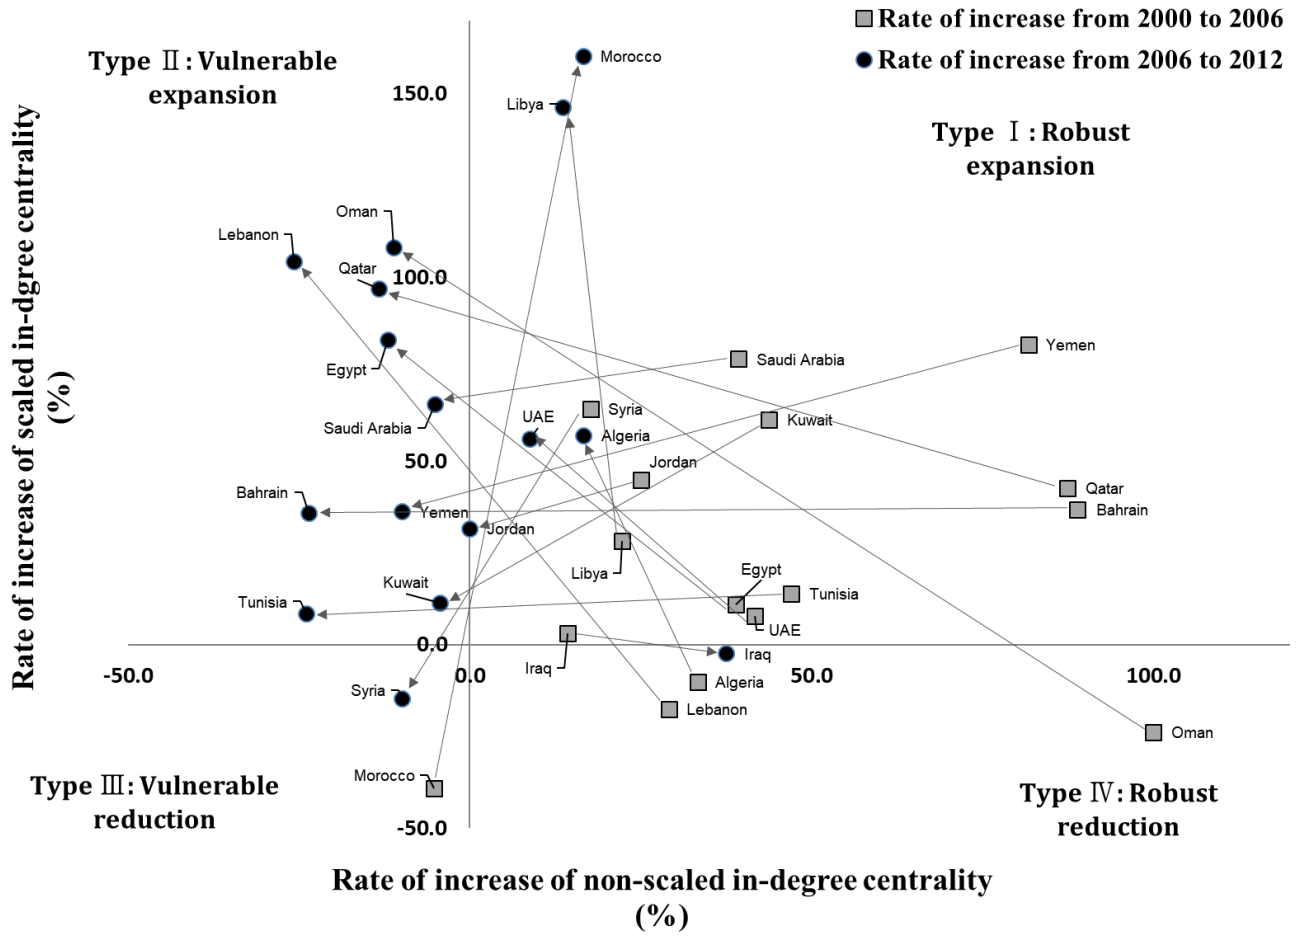

Figure 6. Country types in the MENA region according to the changes of nonscaled and scaled in-degree centralities

526  
527  
528

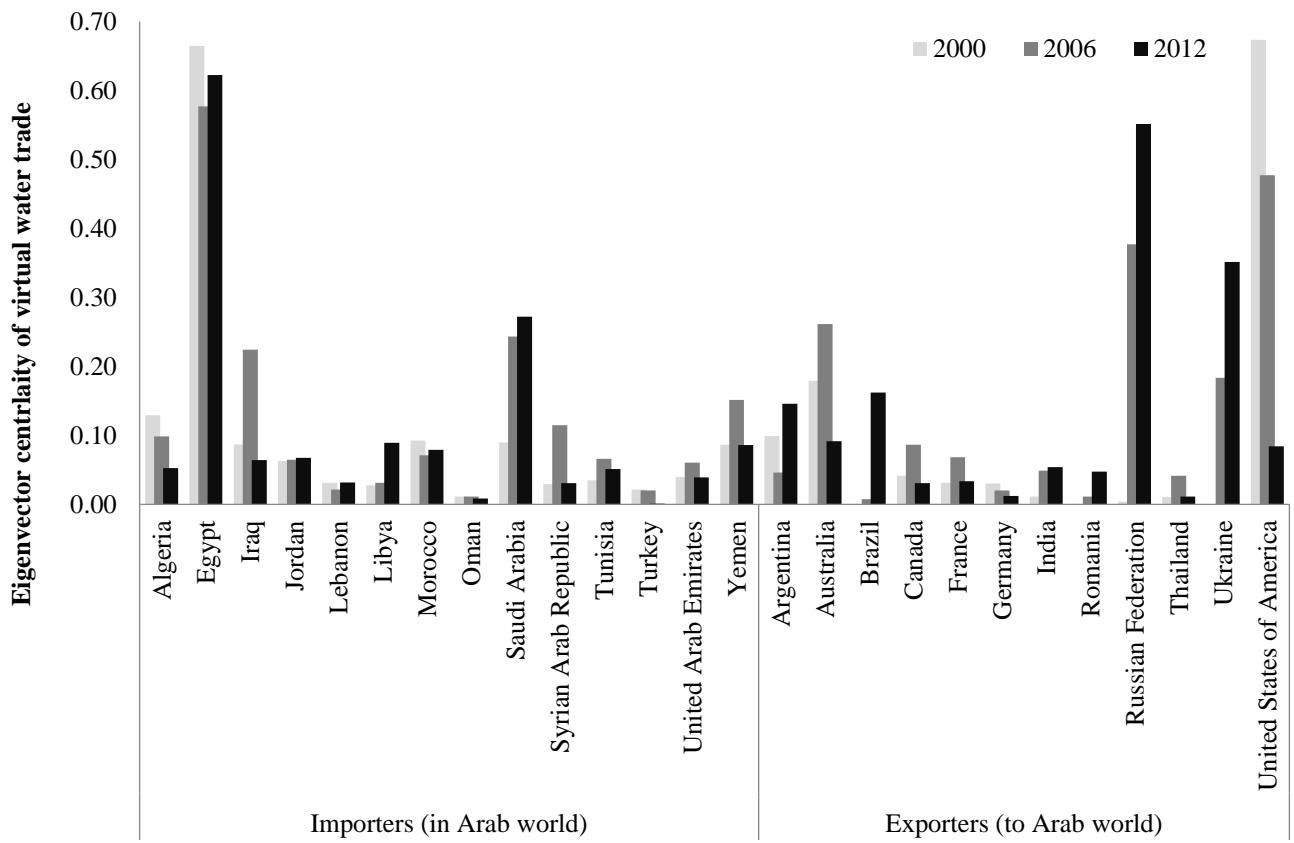

**Figure 7.** Eigenvector centralities of the virtual water trade network in the MENA region in 2000, 2006, and 2012

529  
530  
531

532 **Table 1.** Cultivation area, production, and the quantity of crops imported in the MENA region from 2000 to 2012

| Countries in the MENA region | Cultivation area (ha/year)* |         |           |         |           | Production (ton/year)* |           |           |           |            | Import (ton/year)* |           |           |           |            | Internal water resource (10 <sup>9</sup> m <sup>3</sup> /year)** |
|------------------------------|-----------------------------|---------|-----------|---------|-----------|------------------------|-----------|-----------|-----------|------------|--------------------|-----------|-----------|-----------|------------|------------------------------------------------------------------|
|                              | Barley                      | Maize   | Wheat     | Rice    | Sum       | Barley                 | Maize     | Wheat     | Rice      | Sum        | Barley             | Maize     | Wheat     | Rice      | Sum        |                                                                  |
| ALGERIA                      | 760,545                     | 308     | 1,658,197 | -       | 2,419,050 | 1,049,710              | 1,128     | 2,313,464 | -         | 3,364,302  | 233,887            | 2,112,527 | 5,363,580 | 47,080    | 7,757,074  | 11.25                                                            |
| EGYPT                        | 68,103                      | 876,153 | 1,180,644 | 625,626 | 2,750,526 | 134,034                | 6,812,845 | 7,549,253 | 6,023,684 | 20,519,816 | 24,805             | 5,073,779 | 8,295,988 | 46,292    | 13,440,864 | 1.80                                                             |
| IRAQ                         | 914,074                     | 128,842 | 1,451,219 | 85,182  | 2,579,317 | 751,099                | 307,682   | 2,009,972 | 232,040   | 3,300,793  | 35,378             | 18,960    | 2,545,919 | 742,394   | 3,342,651  | 35.20                                                            |
| JORDAN                       | 31,158                      | 947     | 20,116    | -       | 52,221    | 22,757                 | 17,514    | 23,379    | -         | 63,650     | 487,593            | 385,936   | 792,508   | 137,442   | 1,803,479  | 0.68                                                             |
| KUWAIT                       | 1,058                       | 290     | 173       | -       | 1,521     | 2,191                  | 5,855     | 345       | -         | 8,391      | 178,432            | 134,373   | 284,684   | 171,451   | 768,940    | -                                                                |
| LEBANON                      | 13,515                      | 949     | 45,380    | -       | 59,844    | 24,834                 | 3,579     | 126,623   | -         | 155,036    | 49,278             | 289,707   | 367,370   | 46,087    | 752,442    | 4.80                                                             |
| LIBYA                        | 191,641                     | 1,356   | 165,469   | -       | 358,466   | 94,107                 | 2,997     | 128,149   | -         | 225,253    | 226,317            | 429,407   | 803,545   | 122,579   | 1,581,848  | 0.70                                                             |
| MOROCCO                      | 2,118,032                   | 226,903 | 2,910,977 | 5,876   | 5,261,788 | 1,867,670              | 159,127   | 4,200,596 | 36,936    | 6,264,329  | 392,639            | 1,446,836 | 2,994,446 | 13,307    | 4,847,228  | 29.00                                                            |
| OMAN                         | 1,002                       | -       | 426       | -       | 1,428     | 3,027                  | -         | 1,432     | -         | 4,459      | 35,829             | 99,525    | 288,134   | 118,802   | 542,290    | 1.40                                                             |
| QATAR                        | 947                         | 94      | 15        | -       | 1,056     | 2,841                  | 1,329     | 34        | -         | 4,204      | 33,286             | 3,914     | 47,798    | 87,312    | 172,310    | 0.06                                                             |
| SAUDI ARABIA                 | 12,279                      | 16,689  | 374,414   | -       | 403,382   | 68,366                 | 86,181    | 1,997,598 | -         | 2,152,145  | 6,252,893          | 1,600,081 | 700,703   | 1,009,384 | 9,563,061  | 2.40                                                             |
| SYRIA                        | 1,313,101                   | 53,405  | 1,667,229 | -       | 3,033,735 | 817,609                | 211,675   | 4,008,420 | -         | 5,037,704  | 393,029            | 1,319,461 | 454,904   | 201,690   | 2,369,084  | 7.13                                                             |
| TUNISIA                      | 385,189                     | -       | 722,038   | -       | 1,107,227 | 411,431                | -         | 1,302,438 | -         | 1,713,869  | 407,455            | 737,754   | 1,525,848 | 17,453    | 2,688,510  | 4.20                                                             |
| UAE                          | 14                          | 144     | 18        | -       | 176       | 111                    | 2,931     | 74        | -         | 3,116      | 215,321            | 399,987   | 1,063,996 | 683,336   | 2,362,640  | 0.15                                                             |
| YEMEN                        | 39,276                      | 40,774  | 110,138   | -       | 190,188   | 32,248                 | 57,329    | 173,437   | -         | 263,014    | 2,845              | 343,919   | 2,096,970 | 279,136   | 2,722,870  | 2.10                                                             |

\* Average value from 2000 to 2012 provided from FAOSTAT (<http://www.fao.org/faostat/>)

\*\* Average value from 2000 to 2012 provided from World Bank (<https://data.worldbank.org/>)

533  
534  
535

**Table 2.** Water and land footprints of four major crops in the MENA region

| Countries<br>in the MENA<br>region | Water footprint (m <sup>3</sup> /ton)* |                            |                             |                            |                             |                            |                             |                            | Land footprint (ha/ton)** |       |       |      |
|------------------------------------|----------------------------------------|----------------------------|-----------------------------|----------------------------|-----------------------------|----------------------------|-----------------------------|----------------------------|---------------------------|-------|-------|------|
|                                    | Barley                                 |                            | Maize                       |                            | Wheat                       |                            | Rice                        |                            | Barley                    | Maize | Wheat | Rice |
|                                    | Green<br>water<br>footprint            | Blue<br>water<br>footprint | Green<br>water<br>footprint | Blue<br>water<br>footprint | Green<br>water<br>footprint | Blue<br>water<br>footprint | Green<br>water<br>footprint | Blue<br>water<br>footprint |                           |       |       |      |
| ALGERIA                            | 2859.0                                 | -                          | 964.1                       | -                          | 3290.0                      | 65.2                       | 1080.8                      | -                          | 0.72                      | 0.27  | 0.72  | -    |
| EGYPT                              | 619.2                                  | 1694.7                     | 140.8                       | 1078.2                     | 214.8                       | 903.5                      | 59.0                        | 1003.1                     | 0.51                      | 0.13  | 0.16  | 0.10 |
| IRAQ                               | 3459.7                                 | 4321.4                     | 587.3                       | 1812.2                     | 3069.2                      | 2818.3                     | 256.2                       | 6574.7                     | 1.22                      | 0.42  | 0.72  | 0.37 |
| JORDAN                             | 3167.8                                 | 320.3                      | 126.6                       | -                          | 2267.0                      | 988.7                      | -                           | -                          | 1.37                      | 0.05  | 0.86  | -    |
| KUWAIT                             | 929.3                                  | 2256.3                     | 41.2                        | 207.9                      | 955.4                       | 2287.7                     | -                           | -                          | 0.48                      | 0.05  | 0.50  | -    |
| LEBANON                            | 1919.9                                 | -                          | 507.6                       | 14.4                       | 1556.0                      | 97.0                       | -                           | -                          | 0.54                      | 0.27  | 0.36  | -    |
| LIBYA                              | 6417.6                                 | 1808.2                     | 1151.1                      | -                          | 4360.2                      | 1542.9                     | -                           | -                          | 2.04                      | 0.45  | 1.29  | -    |
| MOROCCO                            | 3692.3                                 | -                          | 3541.0                      | 3182.9                     | 2758.0                      | 244.6                      | 293.0                       | 1278.0                     | 1.13                      | 1.43  | 0.69  | 0.16 |
| OMAN                               | 322.9                                  | 2336.2                     | -                           | -                          | 842.4                       | 1938.5                     | -                           | -                          | 0.33                      | -     | 0.30  | -    |
| QATAR                              | 485.6                                  | 1714.3                     | 78.5                        | 502.9                      | 678.6                       | 1626.3                     | -                           | -                          | 0.33                      | 0.07  | 0.44  | -    |
| SAUDI<br>ARABIA                    | 193.6                                  | 799.8                      | 366.6                       | 1270.1                     | 238.4                       | 1093.2                     | -                           | -                          | 0.18                      | 0.19  | 0.19  | -    |
| SYRIA                              | 5084.0                                 | 41.6                       | 347.3                       | 1573.4                     | 1454.2                      | 440.1                      | 273.2                       | -                          | 1.61                      | 0.25  | 0.42  | -    |
| TUNISIA                            | 3561.1                                 | 75.1                       | -                           | -                          | 2375.0                      | 71.8                       | -                           | -                          | 0.94                      | -     | 0.55  | -    |
| UAE                                | -                                      | -                          | -                           | -                          | 1563.5                      | 507.7                      | -                           | -                          | 0.13                      | 0.05  | 0.24  | -    |
| YEMEN                              | 1904.6                                 | 3234.4                     | 1726.2                      | 2950.8                     | 1804.4                      | 2355.5                     | -                           | -                          | 1.22                      | 0.71  | 0.64  | -    |

\* Water footprint data was referenced by Mekonnen and Hoekstra (2010)

\*\* Land footprint was calculated by crop production and cultivated area provided from World Bank open data (<https://data.worldbank.org/>)

537

538

539

**Table 3.** The annual water and land savings based on imported crops in the MENA region from 2000 to 2012

| Countries in<br>the MENA<br>region | Water savings (million m <sup>3</sup> /year) |               |                |               |                |               | Land savings (thousand ha/year) |         |         |
|------------------------------------|----------------------------------------------|---------------|----------------|---------------|----------------|---------------|---------------------------------|---------|---------|
|                                    | Barley                                       |               | Maize          |               | Wheat          |               | Barley                          | Maize   | Wheat   |
|                                    | Green<br>water                               | Blue<br>water | Green<br>water | Blue<br>water | Green<br>water | Blue<br>water |                                 |         |         |
| ALGERIA                            | 669.0                                        | -             | 2,037.2        | -             | 17,647.6       | 349.9         | 169.5                           | 577.0   | 3,844.7 |
| EGYPT                              | 15.5                                         | 42.4          | 714.3          | 5,470.5       | 1,781.9        | 7,495.6       | 12.7                            | 652.5   | 1,297.4 |
| IRAQ                               | 121.1                                        | 151.3         | 11.2           | 34.4          | 7,814.1        | 7,175.5       | 42.6                            | 8.0     | 1,838.2 |
| JORDAN                             | 1,545.9                                      | 156.3         | 48.9           | -             | 1,797.7        | 784.0         | 668.2                           | 20.9    | 682.3   |
| KUWAIT                             | 165.4                                        | 401.6         | 5.5            | 27.9          | 272.3          | 652.0         | 86.0                            | 6.6     | 142.9   |
| LEBANON                            | 94.1                                         | 0.0           | 147.2          | 4.2           | 571.0          | 35.6          | 26.7                            | 76.9    | 131.5   |
| LIBYA                              | 1,450.4                                      | 408.6         | 493.8          | -             | 3,505.6        | 1,240.5       | 460.2                           | 194.1   | 1,038.1 |
| MOROCCO                            | 1,451.1                                      | -             | 5,123.8        | 4,605.6       | 8,257.3        | 732.3         | 445.7                           | 2,063.3 | 2,074.8 |
| OMAN                               | 11.6                                         | 84.1          | -              | -             | 242.6          | 558.3         | 11.9                            | -       | 85.7    |
| QATAR                              | 16.0                                         | 56.6          | 0.3            | 2.0           | 32.6           | 78.1          | 11.0                            | 0.3     | 21.2    |
| SAUDI<br>ARABIA                    | 1,210.5                                      | 5,001.5       | 586.5          | 2,032.1       | 167.1          | 766.3         | 1,123.1                         | 309.8   | 131.4   |
| SYRIA                              | 1,998.0                                      | 16.3          | 458.1          | 2,075.3       | 661.6          | 200.3         | 631.2                           | 332.8   | 189.2   |
| TUNISIA                            | 1,449.4                                      | 30.5          | -              | -             | 3,624.2        | 109.6         | 381.0                           | -       | 846.0   |
| UAE                                | -                                            | -             | -              | -             | 1,663.6        | 540.2         | 27.1                            | 19.7    | 258.8   |
| YEMEN                              | 5.7                                          | 9.7           | 593.8          | 1,015.1       | 3,783.8        | 4,939.4       | 3.7                             | 244.7   | 1,331.7 |

\* Water and land savings by rice import was not calculated because of the lack of the data of water and land footprints in the MENA region



**Table 4.** The amounts of green and blue water imported in the MENA region from 2000 to 2012

| Countries in the<br>MENA region | Import of green water (million m <sup>3</sup> /year) |         |          |         |          | Import of blue water (million m <sup>3</sup> /year) |       |       |       |         |
|---------------------------------|------------------------------------------------------|---------|----------|---------|----------|-----------------------------------------------------|-------|-------|-------|---------|
|                                 | Barley                                               | Maize   | Wheat    | Rice    | Total    | Barley                                              | Maize | Wheat | Rice  | Total   |
| ALGERIA                         | 242.0                                                | 1,883.6 | 5,104.8  | 57.8    | 7,288.2  | 7.8                                                 | 76.6  | 371.1 | 33.5  | 489.0   |
| BAHRAIN                         | 0.4                                                  | 7.5     | 62.7     | 44.4    | 115.0    | 0.2                                                 | 0.3   | 7.1   | 78.2  | 85.8    |
| EGYPT                           | 37.3                                                 | 3,798.4 | 15,254.1 | 58.4    | 19,148.2 | 1.1                                                 | 295.6 | 418.6 | 32.5  | 747.8   |
| IRAQ                            | 33.2                                                 | 16.7    | 4,645.8  | 1,027.8 | 5,723.5  | 2.2                                                 | 1.3   | 153.9 | 404.8 | 562.2   |
| JORDAN                          | 656.8                                                | 364.2   | 1,483.9  | 81.2    | 2,586.1  | 20.8                                                | 20.8  | 84.5  | 115.0 | 241.1   |
| KUWAIT                          | 257.0                                                | 159.1   | 557.7    | 211.6   | 1,185.4  | 9.7                                                 | 2.3   | 10.2  | 138.1 | 160.3   |
| LEBANON                         | 84.7                                                 | 211.0   | 749.5    | 30.0    | 1,075.2  | 2.3                                                 | 25.6  | 18.9  | 36.0  | 82.8    |
| LIBYA                           | 359.6                                                | 408.9   | 1,245.4  | 56.0    | 2,069.9  | 8.4                                                 | 26.8  | 75.3  | 99.7  | 210.2   |
| MOROCCO                         | 318.6                                                | 1,383.2 | 3,345.0  | 8.9     | 5,055.7  | 12.1                                                | 46.1  | 118.8 | 20.4  | 197.4   |
| OMAN                            | 52.7                                                 | 123.2   | 470.8    | 107.6   | 754.3    | 5.4                                                 | 4.1   | 67.8  | 201.3 | 278.6   |
| QATAR                           | 50.9                                                 | 6.4     | 76.4     | 77.6    | 211.3    | 2.4                                                 | 0.3   | 19.1  | 146.9 | 168.7   |
| SAUDI ARABIA                    | 8,154.5                                              | 1,521.4 | 974.0    | 1,225.9 | 11,875.8 | 324.3                                               | 68.9  | 70.8  | 696.0 | 1,160.0 |
| SYRIA                           | 556.4                                                | 947.3   | 900.0    | 120.8   | 2,524.5  | 12.8                                                | 90.2  | 17.8  | 165.6 | 286.4   |
| TUNISIA                         | 409.8                                                | 611.7   | 2,507.7  | 27.8    | 3,557.0  | 16.0                                                | 40.7  | 73.9  | 11.6  | 142.2   |
| UAE                             | 315.7                                                | 465.8   | 1,671.8  | 859.5   | 3,312.8  | 28.5                                                | 14.3  | 249.3 | 612.5 | 904.6   |
| YEMEN                           | 3.1                                                  | 406.1   | 3,597.3  | 392.7   | 4,399.2  | 1.6                                                 | 8.2   | 247.3 | 220.8 | 477.9   |
